# Supplementary material for: Restoring dryland old fields with native shrubs and grasses: Does facilitation and seed source matter?
Source: PubMed Central journal article supplement (PMC6193679; doi:10.1371/journal.pone.0205760), 2018-10-18
Supplement: pone.0205760.s001.pdf [file pone.0205760.s001.pdf]

**S1 Appendix. Weed composition at the study sites.\***

| Weed species                                                     | Site        |             |
|------------------------------------------------------------------|-------------|-------------|
|                                                                  | North Field | South Field |
| <i>Amaranthus spp.</i> (pigweed)                                 |             | ✓           |
| <i>Bromus madritensis</i> (compact brome)                        |             | ✓           |
| <i>Bromus tectorum</i> (cheatgrass, downy brome)                 | ✓           | ✓           |
| <i>Chenopodium album</i> (lamb's quarters)                       | ✓           |             |
| <i>Chenopodium spp.</i> (goosefoot)                              | ✓           | ✓           |
| <i>Convolvulus arvensis</i> (field bindweed)                     | ✓           | ✓           |
| <i>Descurainia sophia</i> (tansy mustard, flixweed)              | ✓           | ✓           |
| <i>Erodium cicutarium</i> (redstem filaree, stork's bill)        | ✓           | ✓           |
| <i>Hordeum jubatum</i> (foxtail barley)                          | ✓           | ✓           |
| <i>Kochia scoparia</i> (common kochia)                           | ✓           | ✓           |
| <i>Lepidium latifolium</i> (perennial pepperweed, tall whitetop) |             | ✓           |
| <i>Malva neglecta</i> (common mallow, cheeseweed)                | ✓           |             |
| <i>Medicago sativa</i> (alfalfa)                                 | ✓           | ✓           |
| <i>Polygonum spp.</i> (knotweed)                                 | ✓           |             |
| <i>Portulaca spp.</i> (purslane)                                 | ✓           |             |
| <i>Salsola tragus</i> (prickly Russian thistle)                  | ✓           | ✓           |
| <i>Sisymbrium altissimum</i> (tall tumbled mustard)              | ✓           | ✓           |
| <i>Tragopogon spp.</i> (salsify)                                 | ✓           |             |

\* Indicated as presence or absence during monitoring (May 2017), listed alphabetically by species.
