# Supplementary material for: Restoring dryland old fields with native shrubs and grasses: Does facilitation and seed source matter?
Source: PubMed Central journal article supplement (PMC6193679; doi:10.1371/journal.pone.0205760), 2018-10-18
Supplement: pone.0205760.s002.pdf [file pone.0205760.s002.pdf]

## S2 Appendix. Soil characteristics at the study sites.\*

| Soil Characteristic                                                   | North Field    | South Field**   |
|-----------------------------------------------------------------------|----------------|-----------------|
| pH                                                                    | 7.2 ± 0.2      | 7.4 ± 0.04      |
| EC <sub>1:2</sub> (dS m <sup>-1</sup> )***                            | 0.39 ± 0.11    | 0.12 ± 0.01     |
| C (%)                                                                 | 1.34 ± 0.11    | 0.48 ± 0.02     |
| N (%)                                                                 | 0.15 ± 0.01    | 0.05 ± 0.002    |
| δ <sup>15</sup> N (‰)                                                 | 5.1 ± 0.1      | 5.5 ± 0.1       |
| C:N                                                                   | 8.8 ± 0.1      | 9.3 ± 0.1       |
| Nitrification potential rate (mg N kg <sup>-1</sup> d <sup>-1</sup> ) | 13.6           | 1.8 ± 0.5       |
| P (mg P kg <sup>-1</sup> )                                            | 129.3 ± 18.6   | 64.7 ± 2.8      |
| Ca (mg Ca kg <sup>-1</sup> )                                          | 2645.2 ± 158.0 | 1523.1 ± 43.9   |
| Mg (mg Mg kg <sup>-1</sup> )                                          | 474.1 ± 41.5   | 252.7 ± 8.5     |
| K (mg K kg <sup>-1</sup> )                                            | 522.3 ± 68.4   | 296.0 ± 15.1    |
| Na (mg Na kg <sup>-1</sup> )                                          | 129.7 ± 14.8   | 78.3 ± 3.3      |
| ESP (%)***                                                            | 5.4 ± 0.5      | 5.8 ± 0.2       |
| SAR***                                                                | 0.2 ± 0.02     | 0.2 ± 0.01      |
| Sand (%)                                                              | 53.9 ± 2.2     | 78.8 ± 0.9      |
| Silt (%)                                                              | 29.3 ± 1.8     | 15.9 ± 0.8      |
| Clay (%)                                                              | 16.8 ± 1.8     | 5.4 ± 0.2       |
| Soil texture                                                          | Sandy loam     | Loamy fine sand |

Mean ± SE ( $n=3$  for the North Field and  $n=28$  for the South Field for all values, except potential nitrification rate where  $n=1$  (composite of three subsamples) for the North Field and  $n=14$  for the South Field.)

\* Methods described in detail in Dunham-Cheatham SM, Freund SM, Uselman SM, Leger EA, Sullivan BW. Persistent agricultural legacy influences plant restoration success in a native salt desert shrubland. *Agriculture, Ecosystems, and Environment (In Review)*.

\*\* South Field data from Dunham-Cheatham et al. (*In Review*).

\*\*\* Abbreviations: EC = Electrical conductivity; ESP = Exchangeable sodium percentage; SAR = Sodium adsorption ratio.
