# Supplementary material for: Restoring dryland old fields with native shrubs and grasses: Does facilitation and seed source matter?
Source: PubMed Central journal article supplement (PMC6193679; doi:10.1371/journal.pone.0205760), 2018-10-18
Supplement: pone.0205760.s003.pdf [file pone.0205760.s003.pdf]

**S3 Appendix. Species and seeding rates used in the experiment, with location of seed origins.** Our seed source was able to provide information on the state of origin for less local origins, and state/county for more local origins.

| <b>Shrubs</b>                                 | <b>Distant origin (less local)</b>         | <b>Local origin (more local)</b>                  | <b>Rate<br/>(kg PLS ha<sup>-1</sup>)</b> |
|-----------------------------------------------|--------------------------------------------|---------------------------------------------------|------------------------------------------|
| <i>A. tridentata</i> ssp. <i>wyomingensis</i> | California                                 | Northwestern NV<br>(Humboldt/Pershing/Washoe Co.) | 0.56                                     |
| <i>A. canescens</i>                           | Arizona                                    | Lyon/Churchill Co., NV                            | 2.24                                     |
| <i>E. nauseosa</i>                            | Nevada                                     | Lyon/Washoe Co., NV                               | 0.056                                    |
| <i>S. vermiculatus</i>                        | Nevada                                     | Lyon Co., NV                                      | 2.24                                     |
| <i>A. torreyi</i>                             | Arizona                                    | North Central NV                                  | 2.24                                     |
| <b>Grasses</b>                                | <b>Commercial origin</b>                   | <b>Wild collection</b>                            | <b>Rate<br/>(kg PLS ha<sup>-1</sup>)</b> |
| <i>A. hymenoides</i>                          | 'Nezpar', ID                               | Mono Co., CA                                      | 2.24                                     |
| <i>S. airoides</i>                            | VNS <sup>a</sup> , UT (commercially grown) | --                                                | 0.280                                    |
| <i>E. elymoides</i>                           | 'Klamath', OR                              | Mono Co., CA                                      | 2.24                                     |
| <i>L. cinereus</i>                            | 'Trailhead', MT                            | Lassen Co., CA <sup>b</sup>                       | 2.80                                     |

<sup>a</sup>VNS = variety not stated.

<sup>b</sup>Honey Lake Basin.
